# Supplementary material for: Effect of febuxostat on renal function in patients from South China with CKD3 diabetic nephropathy
Source: PubMed Central journal article supplement (PMC7860659; doi:10.1590/2175-8239-jbn-2019-0091), 2020-07-22

## Supplementary Material to: “Effect of febuxostat on renal function in patients from South China with CKD3 diabetic nephropathy”

**Diagram S1** - Effect of febuxostat on renal function in patients with CKD3 diabetic nephropathy.

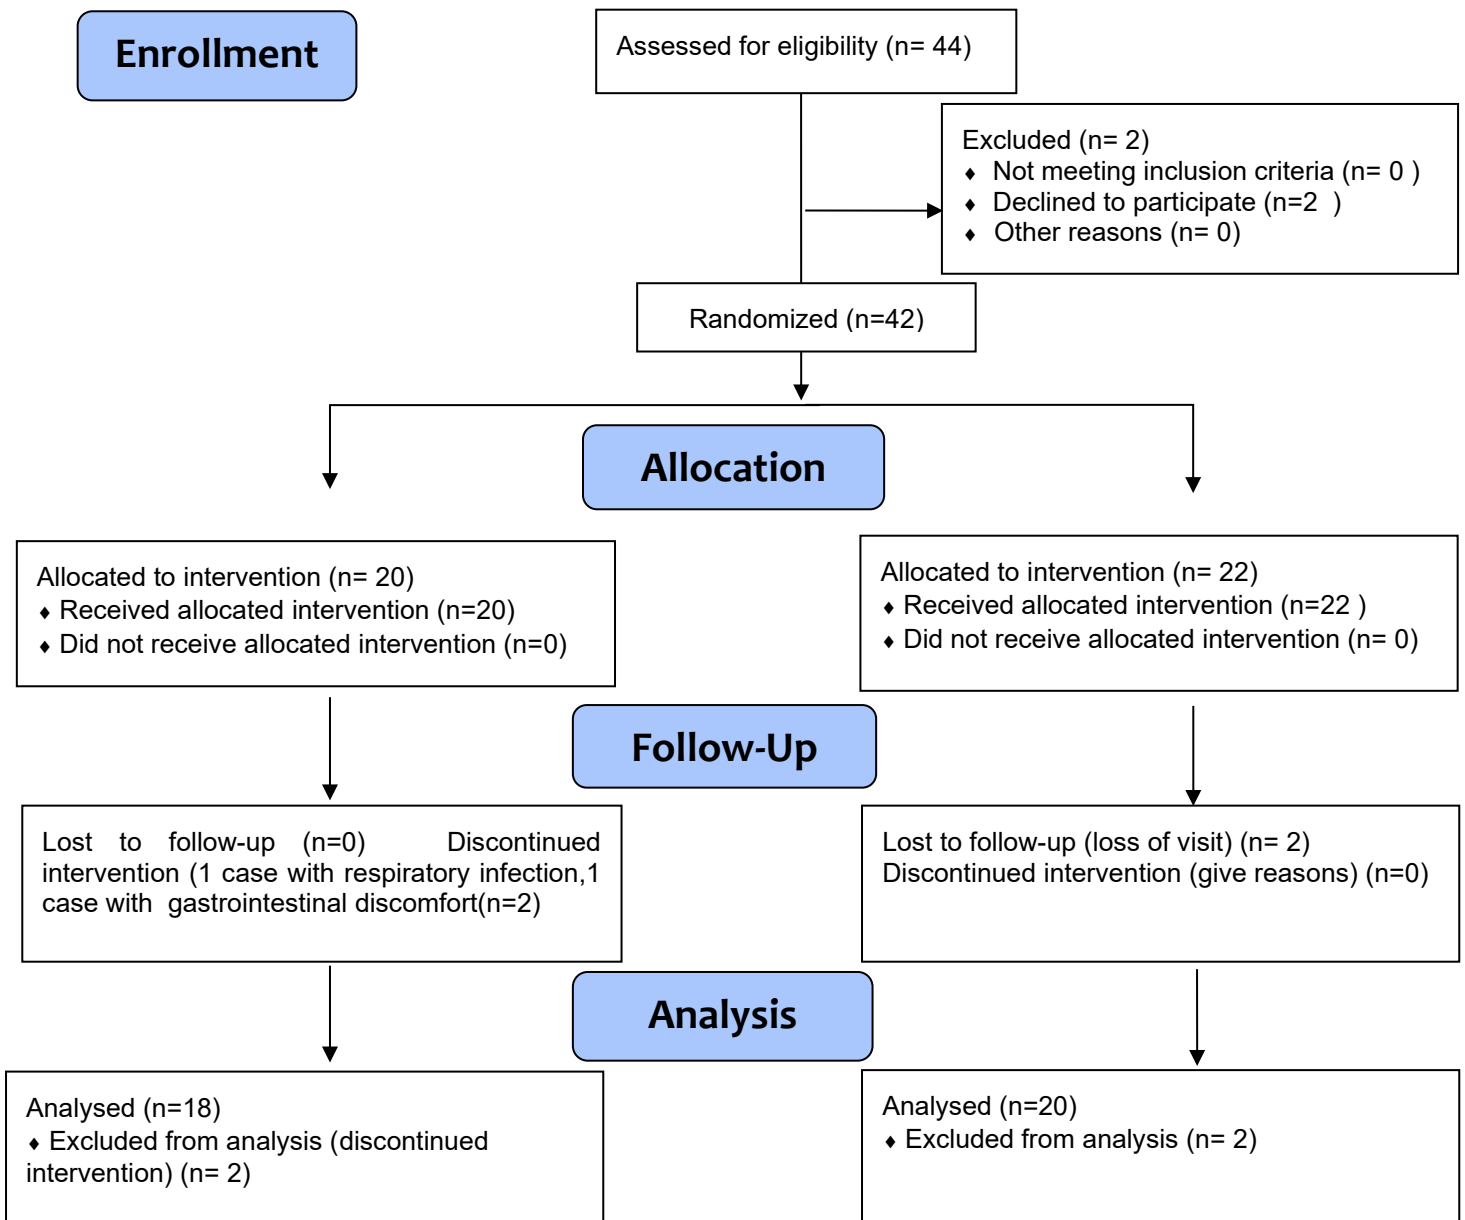

Supplement: 2175-8239-jbn-2019-0091-suppl01.pdf [file 2175-8239-jbn-2019-0091-suppl01.pdf]
